# Supplementary material
Source: MDPI journal article supplement (https://www.mdpi.com/2673-9623/4/1/8)
Supplement: s1 [file s1]

Archive with 1 entries (1 files):
- appliedchem-2887885-supplementary.pdf
